# Supplementary material for: Investigation of chalcopyrite removal from low-grade molybdenite using response surface methodology and its effect on molybdenum trioxide morphology by roasting
Source: Royal Society of Chemistry journal article supplement (doi:10.1039/d3ra02384b), 2023-01-01
Supplement: d3ra02384b1.pdf [file d3ra02384b1.pdf]

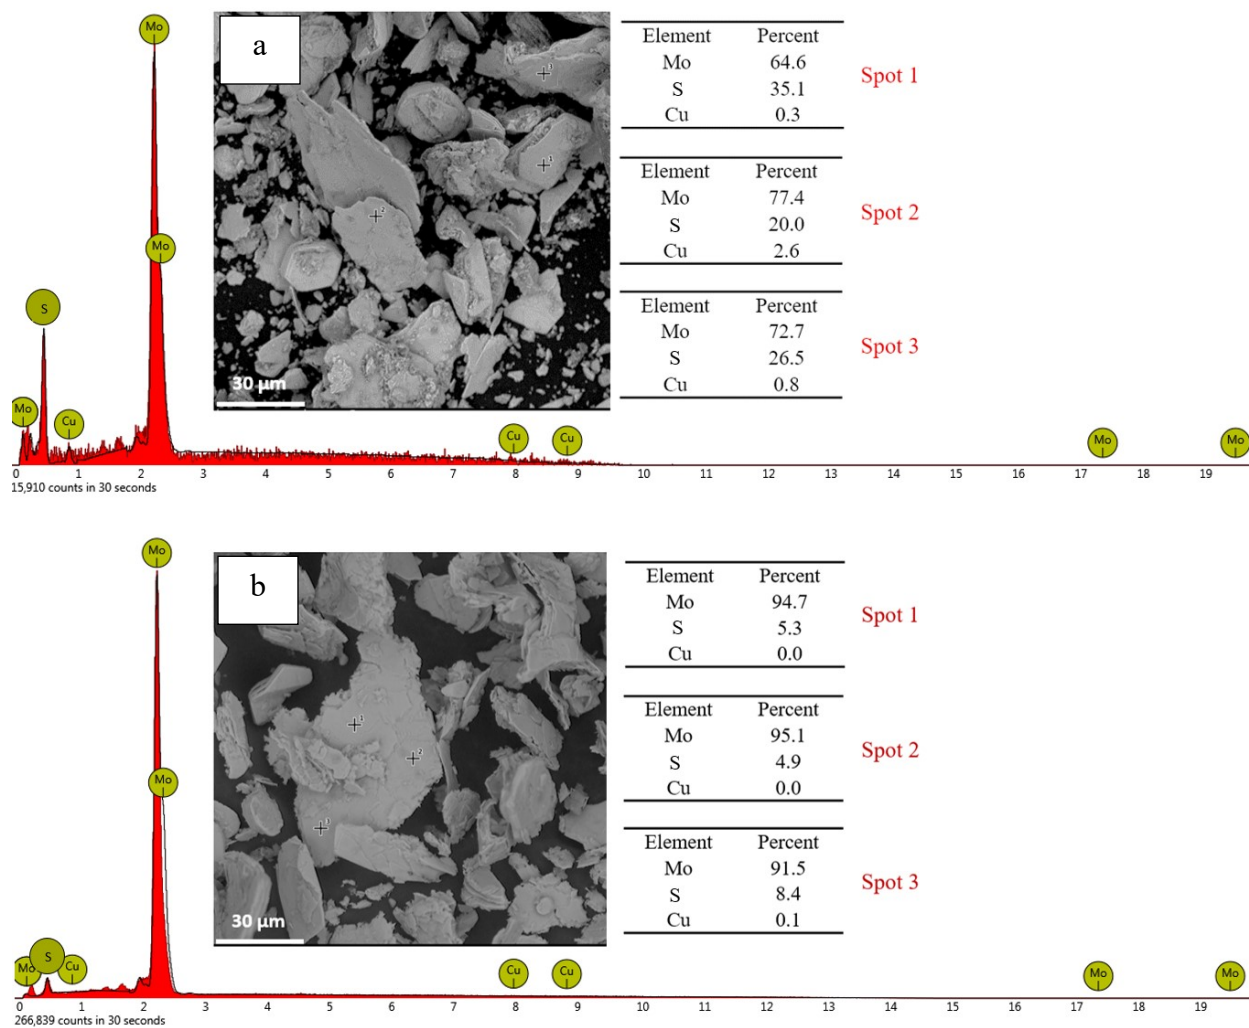

Figure S1. Figure 1. EDS analysis of (a) impure and (b) purified molybdenite concentrate.
